# Supplementary material
Source: publisher figshare collection journal article supplement (https://tandf.figshare.com/articles/dataset/_/5596492)
Supplement: Supplementary file 2 [file 2]

# Description the Simulated Data Set Included in the Supplementary Materials for **Bayesian Semiparametric Multivariate Density Deconvolution**

Abhra Sarkar, Debdeep Pati, Antik Chakraborty, Bani K. Mallick and Raymond J. Carroll

This file provides a description of the simulation design used to generate the simulated data set *Simulated\_Data\_Set.RData* included in the Supplementary Materials. In the following, we use the same notation as in Section 5 of the main paper.

- The dimension of the variable of interest  $\mathbf{X}$  is  $d = 4$ .
- The sample size is  $n = 1000$ .
- For each subject, we simulated  $m_i = 3$  replicates. Total number of replicates is  $N = \sum_{i=1}^n m_i = 3000$ .
- The true density of  $\mathbf{X}$  was chosen to be  $f_{\mathbf{X}}(\mathbf{X}) = \sum_{k=1}^{K_{\mathbf{X}}} \pi_{\mathbf{X},k} \text{MVN}_p(\mathbf{X}|\boldsymbol{\mu}_{\mathbf{X},k}, \boldsymbol{\Sigma}_{\mathbf{X},k})$  with  $p = 4$ ,  $K_{\mathbf{X}} = 3$ ,  $\boldsymbol{\pi}_{\mathbf{X}} = (0.25, 0.50, 0.25)^T$ ,  $\boldsymbol{\mu}_{\mathbf{X},1} = (0.8, 6, 4, 5)^T$ ,  $\boldsymbol{\mu}_{\mathbf{X},2} = (2.5, 4, 5, 6)^T$  and  $\boldsymbol{\mu}_{\mathbf{X},3} = (6, 4, 2, 4)^T$ .
- The true density of  $\boldsymbol{\epsilon}$  was chosen to be  $f_{\boldsymbol{\epsilon}}^{(2)}(\boldsymbol{\epsilon}) = \sum_{k=1}^{K_{\boldsymbol{\epsilon}}} \pi_{\boldsymbol{\epsilon},k} \text{MVN}_p(\boldsymbol{\epsilon}|\boldsymbol{\mu}_{\boldsymbol{\epsilon},k}, \boldsymbol{\Sigma}_{\boldsymbol{\epsilon},k})$  with  $K_{\boldsymbol{\epsilon}} = 3$ ,  $\boldsymbol{\pi}_{\boldsymbol{\epsilon}} = (0.2, 0.6, 0.2)^T$ ,  $\boldsymbol{\mu}_{\boldsymbol{\epsilon},1} = (-0.3, 0, 0.3, 0)^T$ ,  $\boldsymbol{\mu}_{\boldsymbol{\epsilon},2} = (-0.5, 0.4, 0.5, 0)^T$  and  $\boldsymbol{\mu}_{\boldsymbol{\epsilon},3} = -(\pi_{\boldsymbol{\epsilon},1}\boldsymbol{\mu}_{\boldsymbol{\epsilon},1} + \pi_{\boldsymbol{\epsilon},2}\boldsymbol{\mu}_{\boldsymbol{\epsilon},2})/\pi_{\boldsymbol{\epsilon},3}$  so that  $\sum_{k=1}^3 \pi_{\boldsymbol{\epsilon},k}\boldsymbol{\mu}_{\boldsymbol{\epsilon},k} = \mathbf{0}$ .
- For the component specific covariance matrices, we set  $\boldsymbol{\Sigma}_{\mathbf{X},k} = \mathbf{D}_{\mathbf{X}}\boldsymbol{\Sigma}_{\mathbf{X},0}\mathbf{D}_{\mathbf{X}}$  for each  $k$ , where  $\mathbf{D}_{\mathbf{X}} = \text{diag}(0.75^{1/2}, \dots, 0.75^{1/2})$ . Similarly,  $\boldsymbol{\Sigma}_{\boldsymbol{\epsilon},k} = \mathbf{D}_{\boldsymbol{\epsilon}}\boldsymbol{\Sigma}_{\boldsymbol{\epsilon},0}\mathbf{D}_{\boldsymbol{\epsilon}}$  for each  $k$ , where  $\mathbf{D}_{\boldsymbol{\epsilon}} = \text{diag}(0.3^{1/2}, \dots, 0.3^{1/2})$ . For each of  $f_{\mathbf{X}}$  and  $f_{\boldsymbol{\epsilon}}^{(2)}$ , we considered the LF type of covariance structures for  $\boldsymbol{\Sigma}_{\mathbf{X},0} = \{(\sigma_{ij}^{\mathbf{X},0})\}$  and  $\boldsymbol{\Sigma}_{\boldsymbol{\epsilon},0} = \{(\sigma_{ij}^{\boldsymbol{\epsilon},0})\}$ , namely  $\boldsymbol{\Sigma}_{\mathbf{X},0} = \boldsymbol{\Lambda}_{\mathbf{X}}\boldsymbol{\Lambda}_{\mathbf{X}} + \boldsymbol{\Omega}_{\mathbf{X}}$ , with  $\boldsymbol{\Lambda}_{\mathbf{X}} = (0.7, \dots, 0.7)^T$  and  $\boldsymbol{\Omega}_{\mathbf{X}} = \text{diag}(0.51, \dots, 0.51)$ , and  $\boldsymbol{\Sigma}_{\boldsymbol{\epsilon},0} = \boldsymbol{\Lambda}_{\boldsymbol{\epsilon}}\boldsymbol{\Lambda}_{\boldsymbol{\epsilon}} + \boldsymbol{\Omega}_{\boldsymbol{\epsilon}}$ , with  $\boldsymbol{\Lambda}_{\boldsymbol{\epsilon}} = (0.5, \dots, 0.5)^T$  and  $\boldsymbol{\Omega}_{\boldsymbol{\epsilon}} = \text{diag}(0.75, \dots, 0.75)$ ,
- Scale adjustments by multiplication with  $\mathbf{D}_{\mathbf{X}}$  and  $\mathbf{D}_{\boldsymbol{\epsilon}}$  were done so that the simulated values of each component of  $\mathbf{X}$  fall essentially in the range  $(-2, 6)$  and the simulated values of all components of  $\boldsymbol{\epsilon}$  fall essentially in the range  $(-3, 3)$ .
- The true variance functions were as  $s_{\ell}^2(X) = (1 + X/4)^2$  for each component  $\ell$ .

The simulated data set contains the following variables:

- inds = an  $N$ -component vector containing identifying labels for different subjects,
- ws = an  $N \times d$  matrix containing simulated true values of  $\mathbf{W}_{ij}$ .
